# Supplementary material for: The necessity of pen replication to account for and understand the impacts of social dynamics on individual laying hen behavior
Source: Frontiers journal article supplement (doi:10.3389/fanim.2023.1284419), 2023-12-05
Supplement: Table_1.DOCX [file Table_1.DOCX]

Supplementary Material

Search Methods: Full articles were retrieved from Web of Science Core Collection, Current Contents Connect, CABI: CAB Abstracts®, BIOSIS Citation Index, MEDLINE®, Zoological Record and FSTA® - the food science resource. Topic words were ‘laying hen’, then within that ‘behav*’. The 1370 resulting articles were then screened to select those that investigated a treatment effect on laying hen behaviour as measured across individual behavioural tests totalling 123 papers across only laying hens (junglefowl, breeder hens, and dual-purpose birds were not included). Of the 123 papers, further refinement reduced the number to include only those that housed birds (chicks, pullets, or adult layers, some studies included both male and female chicks) in groups of at least 3 and did not include papers testing specific genetically selected feather pecking lines that may have predetermined temperament profiles. The results from the final selected articles are presented in the accompanying Excel file.

**
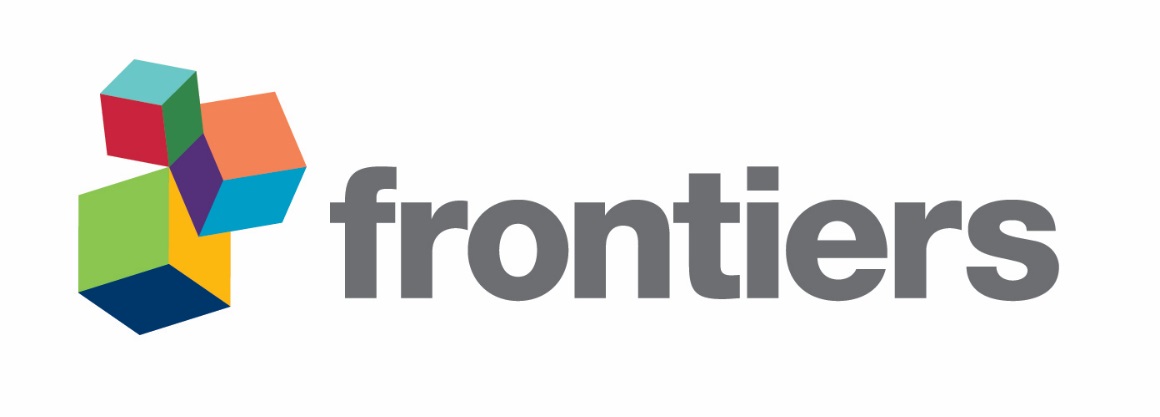
**
